# Supplementary material for: The oxygen sensor prolyl hydroxylase domain 2 regulates the in vivo suppressive capacity of regulatory T cells
Source: eLife journal article supplement (doi:10.7554/elife.70555), 2022-02-22
Supplement: supp [file elife-70555-supp-v1.zip]

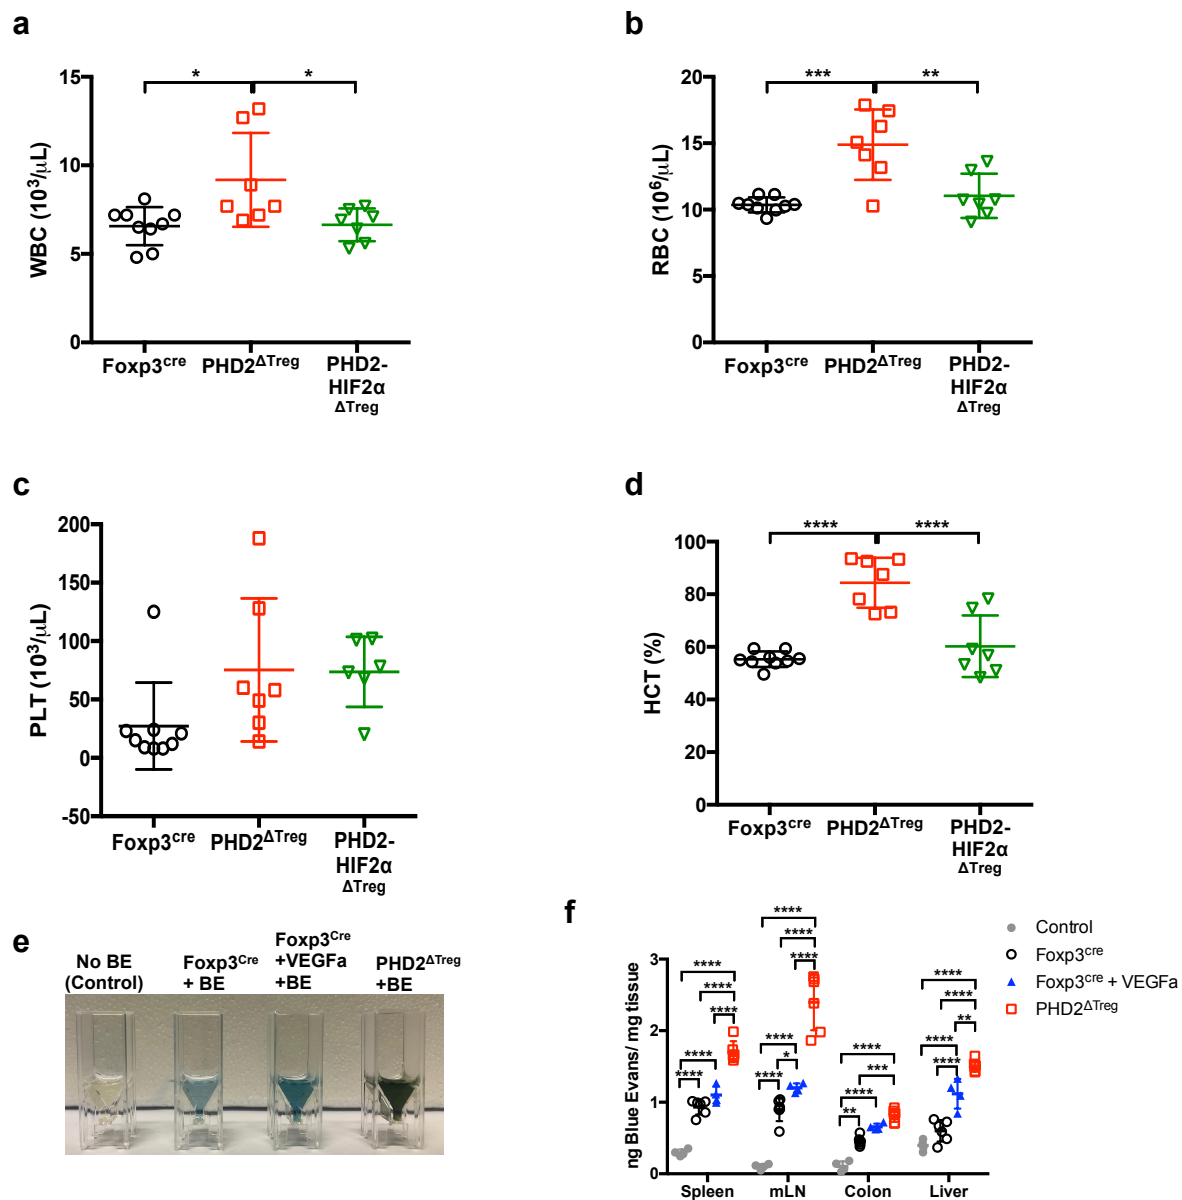

**Figure 1-figure supplement 2. Increased blood cells counts and elevated hematocrit in PHD2<sup>ΔTreg</sup> mice associated with an increase in vascular permeability.**
