# Supplementary material for: The oxygen sensor prolyl hydroxylase domain 2 regulates the in vivo suppressive capacity of regulatory T cells
Source: eLife journal article supplement (doi:10.7554/elife.70555), 2022-02-22
Supplement: supp [file elife-70555-supp-v1.zip]

**a** Downregulated pathways

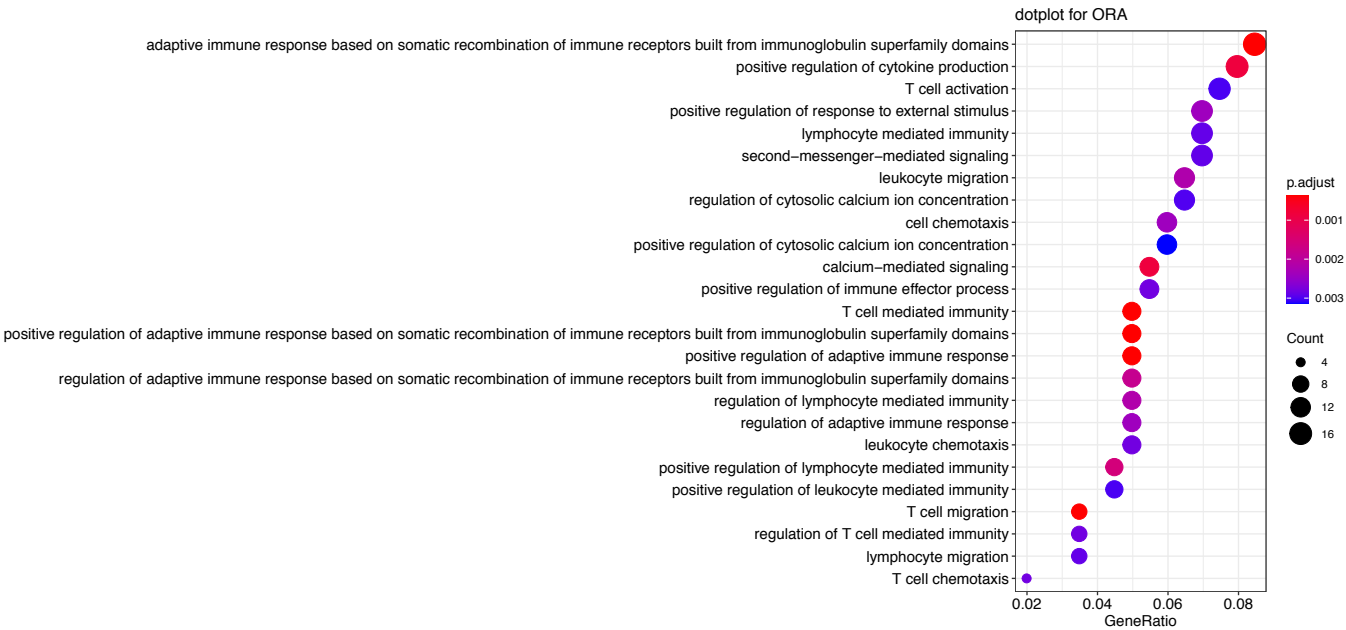

**b** Upregulated pathways

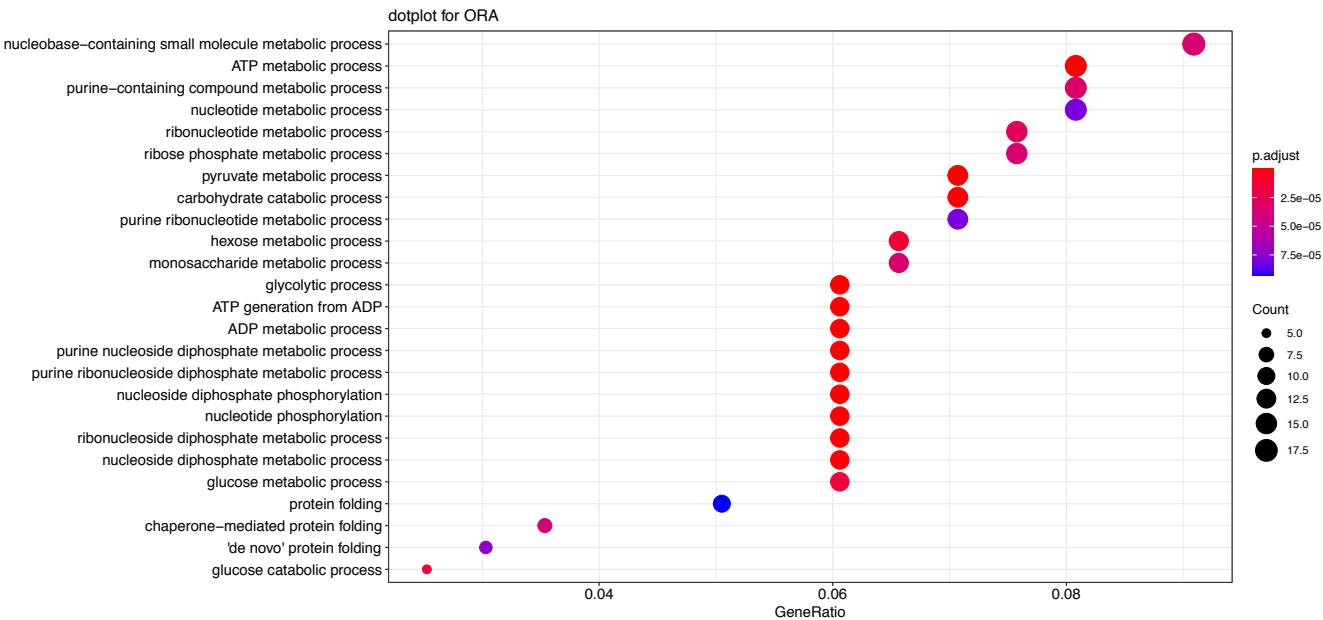

Figure 7-figure supplement 1. Signaling pathways affected by loss of PHD2-expression in Treg.
