# Supplementary material for: The oxygen sensor prolyl hydroxylase domain 2 regulates the in vivo suppressive capacity of regulatory T cells
Source: eLife journal article supplement (doi:10.7554/elife.70555), 2022-02-22
Supplement: supp [file elife-70555-supp-v1.zip]

**a**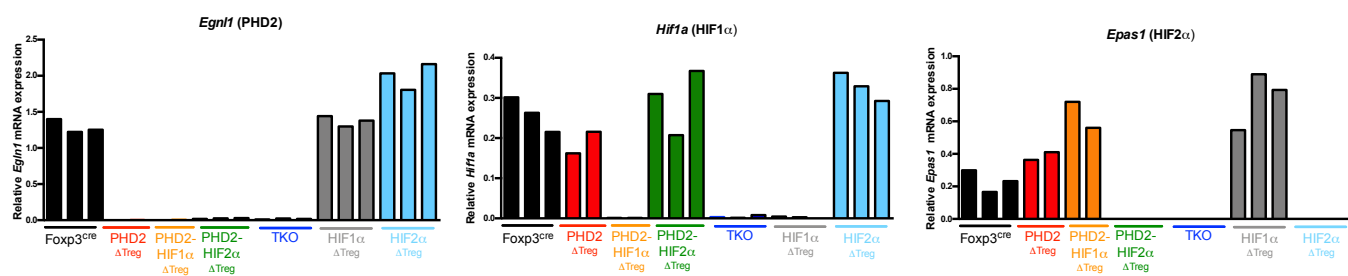**b**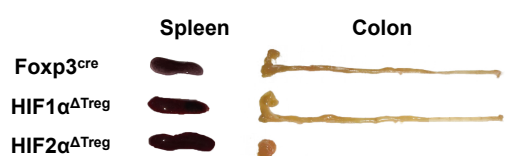**c**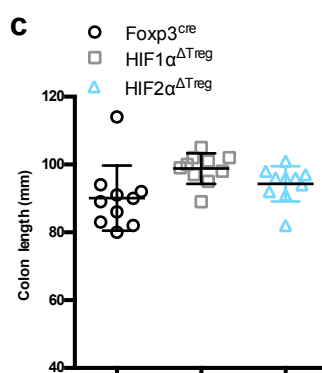**d**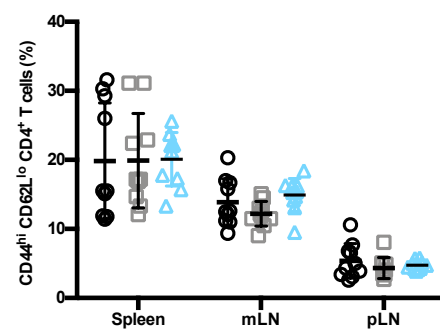**e**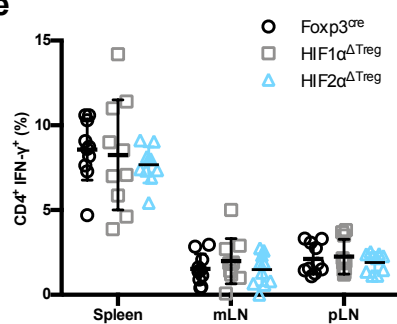**f**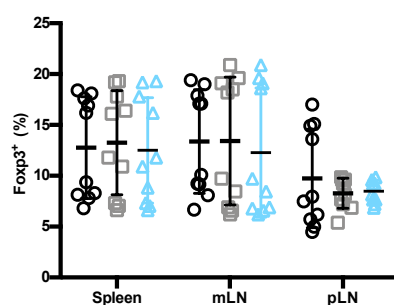**g**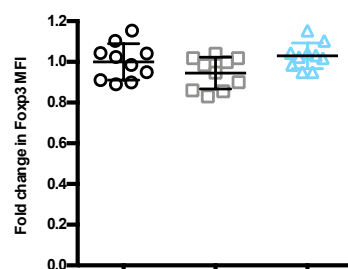

**Figure 6-figure supplement 1. Treg-selective HIF1 $\alpha$  or HIF2 $\alpha$  deficiency does not affect immune homeostasis in naive mice.**
