# Supplementary material for: The oxygen sensor prolyl hydroxylase domain 2 regulates the in vivo suppressive capacity of regulatory T cells
Source: eLife journal article supplement (doi:10.7554/elife.70555), 2022-02-22
Supplement: supp [file elife-70555-supp-v1.zip]

Archive with 25 entries (25 files):
- elife_poa_e70555_Figure_1_figure_supplement_1.pdf
- elife_poa_e70555_Figure_1_figure_supplement_2.pdf
- elife_poa_e70555_Figure_1_figure_supplement_3.pdf
- elife_poa_e70555_Figure_1_figure_supplement_4.pdf
- elife_poa_e70555_Figure_5_figure_supplement_1.pdf
- elife_poa_e70555_Figure_5_figure_supplement_2.pdf
- elife_poa_e70555_Figure_6_figure_supplement_1.pdf
- elife_poa_e70555_Figure_7_figure_supplement_1.pdf
- elife_poa_e70555_Figure_8_figure_supplement_1.pdf
- elife_poa_e70555_Transparent_Reporting_File.docx
- elife_poa_e70555_Figure_1_source_data_1.xlsx
- elife_poa_e70555_Figure_2_source_data_1.xlsx
- elife_poa_e70555_Figure_3_source_data_1.xlsx
- elife_poa_e70555_Figure_4_source_data_1.xlsx
- elife_poa_e70555_Figure_5_source_data_1.xlsx
- elife_poa_e70555_Figure_6_source_data_1.xlsx
- elife_poa_e70555_Figure_7_source_data_1.xlsx
- elife_poa_e70555_Figure_8_source_data_1.xlsx
- elife_poa_e70555_Figure_1_figure_supplement_1_source_data_1.xlsx
- elife_poa_e70555_Figure_1_figure_supplement_2_source_data_1.xlsx
- elife_poa_e70555_Figure_1_figure_supplement_4_source_data_1.xlsx
- elife_poa_e70555_Figure_5_figure_supplement_1_source_data_1.xlsx
- elife_poa_e70555_Figure_5_figure_supplement_2_source_data_1.xlsx
- elife_poa_e70555_Figure_6_figure_supplement_1_source_data_1.xlsx
- elife_poa_e70555_Figure_7_figure_supplement_1_source_data_1.xlsx
