# Supplementary material for: The oxygen sensor prolyl hydroxylase domain 2 regulates the in vivo suppressive capacity of regulatory T cells
Source: eLife journal article supplement (doi:10.7554/elife.70555), 2022-02-22
Supplement: supp [file elife-70555-supp-v1.zip › elife_poa_e70555_Figure_1_figure_supplement_1_source_data_1.xlsx]

## Sheet: Figure 1-figure supplement 1
a
	PHD1											PHD2											PHD3
Treg spleen	1.00157	0.957137	0.442138	0.504989	0.386926	0.316885	0.57197	0.643484	0.726861	0.677421		1.249	1.18334	3.01441	2.63779	1.91381	1.67673	1.61558	1.55322	1.65912	1.1712		0.285098	0.173278	0.0641399	0.0768164	0.105067	0.109643	0.0807754	0.0721944	0.0974872	0.0950274
Treg mLN	1.07824	1.20693	0.334726	0.438456	0.415129	0.503248	0.476668	0.519069				1.56596	1.16199	2.12195	2.09884	0.873143	0.971781	1.16273	1.1768				0.0695938	0.0808309	0.180546	0.161081	0.120002	0.0972828	0.119105	0.113226
Treg pLN	0.442015	0.389342	0.394426	0.402471								1.52935	1.38802	2.37465	2.11472								0.0519848	0.0952597	0.10877	0.0971128
Treg lamina propria	0.216423	0.256153	0.22311	0.32822								1.79831	1.59799	1.67	1.6329								0.131925	0.263512	0.21123	0.153729
b
	Foxp3cre							PHD2ΔTreg
YFP+ spleen	0.57197	0.643484	0.726861	0.677421	0.71129	0.6972		0.0105237	0.0137383	0.0361669	0.0377764	0.0112	0.0222
YFP- spleen	0.401813	0.393664	0.455509	0.398997	0.42781	0.41221		0.252087	0.328893	0.531512	0.484373	0.442	0.5032
YFP+ mLN	0.503248	0.476668	0.522039	0.519069	0.4872	0.5012		0.0106555	0.0127227	0.0196813	0.0197857	0.01211	0.0121
YFP- mLN	0.401737	0.549503	0.534781	0.560926	0.45983	0.5572		0.292549	0.295294	0.4289	0.446861	0.3012	0.4021
c
	Foxp3cre							PHD2ΔTreg
Treg Spleen	0.0263132	0.0354143	0.0450242	0.0423454	0.065421	0.06399		0.0805237	0.0637383	0.0361669	0.0377764	0.040044	0.0432
Treg mLN	0.00867032	0.0022067	0.0038097	0.00711979	0.005527	0.006771		0.0060281	0.00411253	0.0059599	0.0024073	0.00342	0.0041223
e
	Foxp3cre							PHD2ΔTreg
Spleen	1.59	3.53	1.54	2.3	2.8	1.9		5	7	6	5.5	5.8	7.3
mLN	2	4.5	2.5	3.2	2.8	3.2		12	16	9	10	14.5	15.1
pLN	2	3.7	1.4	2.5	3	1.9		5	6	4.5	5.5	5.3	4.9
Lamina propria	1.52	1.07	1.94	1.4	1.3	1.2		13.9	15.2	7.15	10.1	12.4	9.5
