# Supplementary material for: The oxygen sensor prolyl hydroxylase domain 2 regulates the in vivo suppressive capacity of regulatory T cells
Source: eLife journal article supplement (doi:10.7554/elife.70555), 2022-02-22
Supplement: supp [file elife-70555-supp-v1.zip › elife_poa_e70555_Figure_1_figure_supplement_2_source_data_1.xlsx]

## Sheet: Figure 1-figure supplement 2
a	WBC			b	RBC
Foxp3cre	PHD2ΔTreg	PHD2- HIF2αΔTreg		Foxp3cre	PHD2ΔTreg	PHD2- HIF2αΔTreg
7.2	13.2	5.6		9.98	17.44	12.96
7.2	12.7	6.9		10.26	17.87	10.73
7.2	8.9	7.1		10.39	13.18	13.63
6.4	7.2	7.5		10.12	14.12	9.73
6.5	6.9	7.7		10.48	10.28	9.06
6.7	7.7	5.3		10.37	16.28	10.42
5	7.7	6.4		11.16	15.07	10.74
8.1				9.34
4.8				11.15
c	PLT			d	HCT
Foxp3cre	PHD2ΔTreg	PHD2- HIF2αΔTreg		Foxp3cre	PHD2ΔTreg	PHD2- HIF2αΔTreg
8	128	73		54.4	93.5	74.7
21	49	101		54.6	93.3	59.1
125	30	68		55	72.5	78.3
23	14	78		53.9	78.2	51
24	58	102		56	73.2	48.4
9	60	20		55.5	92.5	53.3
12	188			59.4	87.5	56.8
15				49.6
8				59.4
f	Blue Evans
		Control						Foxp3cre								Foxp3cre + VEGFa						PHD2ΔTreg
Spleen		0.29953	0.354675	0.276141	0.245638			0.976866	0.8577	0.994479	1.01453	1.00799	0.753623			0.99667	1.26602	1.03452	1.11233			1.73548	1.58705	1.66729	1.98722	1.62638	1.6529
mLN		0.11501	0.136259	0.0493359	0.0983739			0.592	0.932143	0.907583	0.893048	1.01582	1.03913			1.26897	1.13095	1.16755	1.23492			1.86441	2.75556	2.68293	2.38404	1.9822	2.7222
Colon		0.141799	0.180417	0.029321	0.0673829			0.439592	0.380094	0.574518	0.479079	0.457294	0.412474			0.631447	0.622881	0.720703	0.65482			0.710796	0.879797	0.834672	0.923344	0.702873	0.845621
Liver		0.486449	0.369242	0.301729	0.423673			0.369242	0.589465	0.760031	0.725166	0.4876	0.669345			0.844752	1.33246	1.20298	1.09383			1.49553	1.53576	1.43491	1.5129	1.42134	1.64537
