# Supplementary material for: The oxygen sensor prolyl hydroxylase domain 2 regulates the in vivo suppressive capacity of regulatory T cells
Source: eLife journal article supplement (doi:10.7554/elife.70555), 2022-02-22
Supplement: supp [file elife-70555-supp-v1.zip › elife_poa_e70555_Figure_1_figure_supplement_4_source_data_1.xlsx]

## Sheet: Figure 1-figure supplement 4
CD4+	Foxp3cre																PHD2ΔTreg
Spleen	18368210	15935170	13755460	25012080	11985770	20082290	13709440	10039100	10709250	8345177	38736630	31392550	18269500	23766320	25650510		15795190	13917050	13021770	31297940	29846790	27351410	37622690	39248680	27326740	30385660	36785720	29976900	24058580	45447180	14390860
mLN	4853922	4820040	911493	2695573	2753323	2480272	558844	236288	526962	496469	2359423	3453818	1328799	1165603	1683715		2949905	3390059	2545586	2831266	4430346	2400272	5830124	3954785	5189902	4341989	5223175	12865030	4120633	3765792	6681271
pLN	731612	2682405	1439397	448357	265100	2177767	1430085	371828	1662882	1103391	1196148	1068821	1032505	1439108	1109283		2972907	4218914	4954645	2459218	3035950	3320315	3712926	3782171	2883747	2506816	3538146	3112521	3364059	3498272	3060813
Lamina propria	219278	30889	239560	363300	314383	72270.3	294211	21286.2	122067	477565	224365	205632	187042	275746	264903		305064	474010	253909	397000	25680.4	258793	384204	277736	134495	441414	145855	277581	337908	243981	359789
CD8+	Foxp3cre																PHD2ΔTreg
Spleen	11001960	10815210	3130370	15342460	18972750	13592500	1666637	1258695	1693957	1211217	17296360	17151560	18203550	2818941	3144474		6328120	8116206	8286580	23399780	13104420	8689499	17718690	13768460	9900410	17348740	21432750	12382730	11705270	31915850	6621146
mLN	8167133	7230060	9635073	3600609	3790905	3275155	3586323	2115083	4301729	3699183	3551552	4698898	1930647	8810206	11088250		4241889	5135076	4080009	3949437	6254607	3361575	7461424	5350001	5326180	5588492	6809006	19778640	5782516	4433988	10027830
pLN	863269	2964146	1708259	3594503	2089348	2486446	3416852	2955661	3922943	2575571	2387269	2507136	3041282	3108507	2830966		3364428	5283983	4575097	2469773	3380944	3348938	4415606	3642681	3056006	2683196	3770478	3274266	3494332	3703882	3234407
Lamina propria	56774.7	4885.12	37440.4	82711	94408.1	14920.9	55614.2	4755.11	27962.3	100743	39972.5	42959.9	39953.4	63073.5	55748.6		81945.3	156028	70417.4	145146	8379.55	77356.6	114582	88790.9	42012.2	128530	48072.9	86055.9	103144	76223	113402
Foxp3+	Foxp3cre																PHD2ΔTreg
Spleen	3232805	2932072	2295371	4527186	5405595	3253331	1072078	833245	1003457	679297	6236598	5148378	6199660	2100943	2431668		3806640	2978249	2747593	5226756	3096100	2585361	7449293	8634709	6476438	5834047	6842144	7374317	5774060	10316510	2863781
mLN	1396580	1373711	642659	644509	735436	560051	328148	213623	397480	298894	646382	869296	359100	597332	1099954		750814	852423	742562	813584	1075792	571468	1260981	1166300	1001322	1095345	1395846	3303034	1092896	931137	1945399
pLN	128627	403124	257947	268869	165894	221294	389521	387192	293436	204500	231565	353506	257901	230030	209492		420554	1030377	850968	518652	723522	589413	759484	710323	553137	590303	882292	550077	646451	662995	630709
Lamina propria	34426.6	6363.14	34975.8	53041.8	63191.1	11346.4	60607.4	3107.78	17821.8	99811	40834.4	29405.3	29178.6	52667.4	49536.8		107077	153579	63223.3	100044	7832.53	59781.2	138313	102762	45862.8	140811	42152.2	72726.3	118268	72462.3	100381
Activated CD4 T cells	Foxp3cre																PHD2ΔTreg
Spleen	1753025	1958672	3656526	5156991	3921839	4824971	3981275	1420683	1101211	2313659	5530042	3816361	7106494	3655023	3084012		5233341	3788138	3377000	6946547	5375782	6508272	15533660	21729250	15391730	10089620	9177301	11518230	7276651	11188240	6509147
mLN	807378	719391	980369	485250	335419	326448	512242	237452	363599	401905	329602	433920	197134	859392	1155041		539526	693934	572197	413324	960251	575448	962927	1079309	967234	917530	755575	2957026	1069945	851026	2466064
pLN	22407	98745.2	37175.1	166398	83524.8	161762	318905	178126	117894	154168	70137.6	76105.7	132588	97208	76501.1		271256	736984	453566	177818	184280	173006	492175	311124	162416	263488	343217	246433	286254	308359	248509
Lamina propria	165688	22435.6	192858	254173	221603	54007.6	190405	16147.8	80136.8	341606	175129	151087	147632	181888	183239		182160	292521	170606	286822	17092.2	170354	233270	193632	80269.3	277728	99634.5	182091	219390	162428	236609
