# Supplementary material for: The oxygen sensor prolyl hydroxylase domain 2 regulates the in vivo suppressive capacity of regulatory T cells
Source: eLife journal article supplement (doi:10.7554/elife.70555), 2022-02-22
Supplement: supp [file elife-70555-supp-v1.zip › elife_poa_e70555_Figure_1_source_data_1.xlsx]

## Sheet: Fig.1
a
	Foxp3cre												PHD2ΔTreg
4	17.2	15.1	15	16.5	15.5	16.2							14.5	15.8	16.1	16.2	14.5	14.6	17.7	16	16
5	19.2	16.9	16.9	16.9	16.5	17.7							17.1	17.3	17.2	17.6	15.7	16.5	17.8	16.8	16.8
6	21.2	18.6	18.3	18.9	17.6	19.3							18.6	18.5	18.9	18	17.1	18.1	18.1	17.6	17.6
7	22.4	19.8	20	20.3	19.9	21.4							20.3	20.5	21.3	20.2	19.2	19.7	18.9	18.6	18.6
8	23.9	21.1	20	21.8	21.1	22.4							20.1	20.2	21	19.1	18.3	21.4	18.2	18.6	20.5
9	24.5	21.5	20.4	22.1	22	23.4							20.3	21.5	21.8	19.9	18.2	22	18.8	19.3	21.4
10	24.9	22.3	21.6	22.8	23.2	23.8							21.8	22.4	22.7	21.2	19.7	22.8	20.2	20.3	22.7
11	25.2	22	21.3	22.7	22.4	23.4							21	22	22.2	19.8	20	21	19.8	19	21
12	25.4	22.3	21.6	23	23	24							21.2	22	22	20	20.3	21.3	20.2	19.4	20.8
d			f	CD4+
Foxp3cre	PHD2ΔTreg		Foxp3cre																PHD2ΔTreg
90	82		58.1	55.4	77.1	58.2	58.5	55.7	76.5	72.5	74.6	75.1	64.5	60.4	63.7	76.3	75.7		62.9	55.9	56.1	53.1	57.4	62.9	63.7	68.7	67.9	59.9	59.9	67.3	66	57.8	58.6
94	80		59.9	57.6	77.8	55.3	55.9	54.8	73.8	71.7	76	76	57.2	55.1	57.1	74.3	73.1		56.8	56.5	57.7	55.1	75	56.3	52.6	69	46.9	53.8	74.9	55.5	54.5	69.9	57.1
83	64		51.8	50.5	52.1	75.2	74.4	52	53	50	70	72	56	72.6	69	76	71		50.7	51.1	44.6	46.8	49	46.8	51.7	50.1	70.1	54	58	57	52	69.9	59
82	61		75.7	82.2	81.9	69.4	67.6	74	83	79	69.2	67	82.2	79.5	68.6	69.9	75.7		75.2	72	75	69.2	89	73.6	75.9	88	74	68	78	75	73.7	65.4	69
86	83			CD8+
114	75
92	77		Foxp3cre																PHD2ΔTreg
91	74		34.8	37.6	27.15	35.7	34.7	37.7	39.3	29.09	19.8	30.9	28.8	33	30.3	17.05	18.28		25.2	32.6	35.7	39.7	37.9	31.5	30	24.1	24.6	34.2	34.9	27.8	38	23.6	22.9
80	75		35.6	38.4	27.36	41.4	40.6	41.5	19.5	28.01	29.31	30.2	38	40.5	39.3	19.83	21.1		39.5	37.3	36	39.5	39.1	40.2	41.1	39.4	45.7	41.8	41.5	36.1	45.1	35.9	40.5
89	85		43.9	45.7	43.9	29	28	35	45.7	43.9	32	31	46	33.7	32.4	31	30.5		44.8	40.8	48.3	46.6	44	46.4	44.9	43.8	46.3	44.6	34.9	36.9	32.9	41.9	32.9
91	79		19.6	13	12.8	15.8	20.3	19	13	12.8	15	20.3	29.9	28	19.3	26.7	28		20.2	23.7	20.8	25.3	23.2	28.6	20	19.8	23.3	24.2	20	19.7	25	15	27
94	91
98	86
101	87
100	77
98	88
100	80
97	77
98	85
97	79
100	78
105	80
96	76
95	82
97	80
h
Foxp3cre																				PHD2ΔTreg
11.9	15.5	11.8	26	15.1	29.3	31.6	15.5	11.4	30.3	17.2	14.7	22.4	16.9	13.3						34.5	26.2	39.1	26.7	23.5	48.8	57.4	32.7	50.8	57.3	53.5	37.7	45.6	61.7	66.3
12.1	12.5	11	16.7	11.2	12.2	15.8	12.6	9.35	11.9	11.5	11.5	12.7	10.5	11.6						15	15	18.7	16	14.3	20.8	17.1	18.2	15.6	30.6	20	19.8	23.1	20.7	18.1
3.09	3.91	2.6	5.01	4.35	7.69	10.6	6.54	3.41	6.78	3.36	3.44	4.89	3.56	3.05						5.71	4.58	9.48	4.17	6.05	7.06	9.75	9.92	7.73	6.43	7.54	7.71	10.2	7.45	10.5
93.4	93	97.7	82.6	89	94	97.8	92.4	81.3	88.1	95.5	90.4	96.1	80.7	85.1						93.3	92.8	90.8	97.5	96.6	86.5	93.9	91.3	89.7	88.1	80.9	94.7	98.7	86.4	87.6
i
Foxp3cre																PHD2ΔTreg
10.6	10.3	4.7	8.74	7.29	9.07	10.6	7.63	8.18	8.61	7	8.53	9	7.6	9		26	21.8	20.8	15.3	16.8	19.6	22.5	14.7	30.6	16.4	18.9	20.1	25	19.5	31
0.9	2.96	1.61	1.46	1.14	2.84	2.08	1.37	0.47	0.41	2	5	1	1.2	1.4		2.64	3.11	3.5	3.93	10.3	9.04	6.29	5.33	4.91	3.93	10.3	10.1	8.4	6	5.4
3.31	3.32	1.5	1.26	2.76	1.09	1.45	3.08	1.54	1.84	3.8	1.4	1.2	1.3	3.5		5.98	4.92	5.53	6	8.8	6.5	7	6.1	8.6	7.8	6.4	7.1	5.4	9.4	8
9.91	6.61	10	5.9	4.9	7.8	7.5	9.6	10.3	7.9	9.5	6.9	11	5.9	7.3		9.83	8.9	15	9.9	16	18	10.5	17.7	13.4	12.5	14.6	18.1	12.1	11.9	13.7
j
Foxp3cre	PHD2ΔTreg		Foxp3cre	PHD2ΔTreg		Foxp3cre	PHD2ΔTreg		Foxp3cre	PHD2ΔTreg
0.553958	2.98975		0.719581	1.0578		1.05561	1.54476		0.841182	1.45666
1.4217	1.62985		1.44955	1.44909		1.29895	1.21342		2.10381	1.96254
0.818667	1.94827		1.06686	1.84289		1.07097	1.85173		0.937284	1.98438
1.04454	2.76543		1.17778	2.83189		1.06046	2.22347		0.882227	4.75957
0.761631	1.31296		0.649017	2.02205		0.826222	1.68369		0.49625	1.98944
1.39951	2.8871		0.937219	1.64887		0.687792	1.48871		0.739244	1.9981
0.676202	1.88771		1.12672	1.78909		0.866391	1.8881		0.973486	4.35902
1.33502	1.55711		1.05274	2.9998		1.39992	2.37721		1.28038	2.44993
0.988774	3.111		0.82054	2.2265		0.733693	1.89311		0.746139	3.7761
Foxp3cre	PHD2ΔTreg		Foxp3cre	PHD2ΔTreg		Foxp3cre	PHD2ΔTreg		Foxp3cre	PHD2ΔTreg
0.815871	1.61913		0.31418	1.12867		0.544826	1.61973		0.305471	1.72573
1.18995	1.54306		1.88192	0.777372		2.61954	1.70786		1.00209	2.73752
0.865011	0.813463		1.20925	1.0011		0.552089	1.00038		0.84036	0.760611
1.48406	2.54965		0.777006	0.9988		1.15603	1.59859		1.38663	1.44836
0.742354	1.25152		0.928299	1.3881		0.379848	1.12233		1.28956	0.721669
0.902759	1.94112		0.850876	0.69981		0.747666	1.5441		1.17589	1.51711
0.825902	1.6611		1.0099	1.117		0.469755	0.700776		1.26834	0.778901
1.04621	2.4998		0.897711	0.8887		0.738227	0.833322		1.13687	1.0221
1.12789	1.56511		0.99811	0.77611		1.79202	0.761111		0.594787	0.885761
