# Supplementary material for: The oxygen sensor prolyl hydroxylase domain 2 regulates the in vivo suppressive capacity of regulatory T cells
Source: eLife journal article supplement (doi:10.7554/elife.70555), 2022-02-22
Supplement: supp [file elife-70555-supp-v1.zip › elife_poa_e70555_Figure_2_source_data_1.xlsx]

## Sheet: Fig.2 
a
Foxp3cre																PHD2ΔTreg
17.6	18.4	6.8	18.1	16.9	16.2	7.82	8.3	9.37	8.14	16.1	16.4	16.2	8.84	9.48		24.1	21.4	21.1	16.7	15.6	14.9	19.8	22	23.7	19.2	18.6	24.6	24	22.7	19.9
17.1	19	6.67	17.9	19.4	17.1	9.15	10.1	9.24	8.08	18.2	18.5	18.6	6.78	9.92		17.7	16.6	18.2	20.6	17.2	17	16.9	21.8	18.8	19.6	20.5	16.7	21	18.9	19.4
14.9	13.6	15.1	7.48	7.94	8.9	11.4	13.1	7.48	7.94	9.7	14.1	8.48	7.4	7.4		12.5	19.5	18.6	21	21.4	17.6	17.2	19.5	18.1	22	23.4	16.8	18.5	17.9	19.5
15.7	20.6	14.6	14.6	20.1	15.7	20.6	14.6	14.6	20.9	18.2	14.3	15.6	19.1	18.7		36	35.1	32.4	24.9	25.2	30.5	23.1	37	34.1	31.9	28.9	26.2	35	29.7	27.9
c
	Foxp3cre							PHD2ΔTreg
CD25+ Foxp3+	2.57	2.49	1.29	2.51	1.98	2.53		2.24	2.21	1.23	1.27	1.12	1.35
CD25- Foxp3lo	0.64	0.44	0.12	0.31	0.27	0.41		0.55	0.63	0.9	1	1.1	0.87
CD25+ Foxp3-	2.14	2.01	2.36	1.65	1.72	1.54		2.1	2.35	1.86	2.1	2.2	2.8
d
	Foxp3cre	PHD2ΔTreg
	22.3	35.6
	18.7	40.1
	25.9	38.4
	15.9	31.8
	30.1	42.1
	20.5	34.8
e
Foxp3cre																PHD2ΔTreg
39.4	42.1	64.9	38.5	35.7	36.1	66.1	67.4	71.1	62.7	69.5	61.3	63.9	67.3	70		71.6	61.1	58.2	60.6	58.2	59.7	73.8	59.4	44	60.5	43.9	61.7	43.7	51.4	41
38.3	36.1	24.8	42.6	43	43.9	24.4	23.1	20.3	26.3	22	28.8	27.1	24.2	22.4		17.4	25.1	26.2	22.2	24.6	25.1	18.7	28.9	39.7	28.5	46.8	33.8	46.9	38.6	49
11.4	11.5	2.18	9.34	11.3	9.63	1.94	1.76	2.26	1.79	2.92	4.07	2.82	1.86	1.52		4.21	5.24	5.92	7.29	6.38	7.06	2.1	4.18	7.55	3.22	7.47	3.01	7.58	8.28	8.56
f
Foxp3cre																PHD2ΔTreg
14.2	17.2	20.5	11.3	9.2	5.13	5.14	7.44	5.67	5.58	4.83	5.99	7.94	11.9	8.93		6.84	5.1	5.94	7.31	3.54	3.57	8.65	5.9	8.71	4.77	5.88	6.1	7.9	6.7	7.99
23.1	26.8	21.4	44.8	40.1	44.4	37.3	40.6	45.8	22.3	28.6	28.5	35.9	32.1	43.1		25.3	19	17.6	48.7	44	49.5	26	23.6	18.9	49.1	42	39.6	35.7	36.9	25.8
5.14	5.05	6.27	4.07	5.4	6.59	9.89	11.9	9.07	11.5	2.24	2.79	2.49	5.09	3.77		3.01	5.08	4.27	3.5	6.62	9.3	2.24	2.03	2.81	6.25	4.47	4.56	2.7	3.1	3.4
g
Foxp3cre	PHD2ΔTreg
0.91	0.78
0.89	0.88
0.9	0.89
1.15	0.88
1.1	0.96
1.04	0.95
1.02	1.09
0.98	0.92
1.04	0.92
0.95	0.95
0.95	0.86
1.02	1
1.03	0.89
1.06	0.87
0.94	0.92
h
Foxp3cre	PHD2ΔTreg		Foxp3cre	PHD2ΔTreg		Foxp3cre	PHD2ΔTreg		Foxp3cre	PHD2ΔTreg		Foxp3cre	PHD2ΔTreg
0.836822	0.507692		0.935326	0.543497		1.02288	0.835203		0.925214	0.946581		0.994006	1.18891
1.36948	0.568222		1.07067	0.734285		0.92119	0.832959		1.14957	3.0235		0.885885	1.53487
1.31323	0.754655		1.16391	0.686233		1.00568	0.761178		0.925214	1.38889		0.847665	0.935326
0.859969	0.788402		1.10254	0.677448		1.05428	0.722297		1.1959	1.06322		0.751061	1.07067
0.826804	0.579801		1.11039	0.715647		0.995962	0.633015		0.778723	2.60076		1.13338	1.16391
1.18891	0.546354		1.00518	0.58279		0.994006	0.706128		1.00304	1.49362		0.903544	1.00304
1.53487	0.615012		1.13338	0.7172		0.935326	0.74339		1.06714	1.47173		0.980873	1.06714
0.811842	0.773128		0.903544	0.618826		1.07067	1		0.962205	0.923077		1.10274	0.962205
0.850555	0.67179		1.01284	0.667037		1.16391	1.17448		0.727434	1.85549		1.01284	0.87652
i
Foxp3cre										PHD2ΔTreg
3.60107	3.62891	5.18491	5.88774	3.43169	4.62541	5.81112	4.98665	3.54332		5.68905	5.34681	5.35496	5.81224	5.9981	5.17779	3.98111	4.98811	4.5679
4.7966	4.3546	5.79812	6.22774	4.87531	4.14327	5.88771	6.11182	4.43379		7.08069	6.12022	6.60363	6.28033	7.80687	6.21123	4.68871	5.38032	4.88711
k
Control	Foxp3cre	PHD2ΔTreg
1717.75	518397	739178
1162.97	516397	754572
1867	532148	765428
1654	521349	786541
1732	712390	711120
1261	654219	739178
l
Foxp3cre	PHD2ΔTreg
0.910266	1.02356
0.98	0.98492
1.1	1.04147
0.99	0.950047
0.9	0.99
1.04368	1.01822
