# Supplementary material for: The oxygen sensor prolyl hydroxylase domain 2 regulates the in vivo suppressive capacity of regulatory T cells
Source: eLife journal article supplement (doi:10.7554/elife.70555), 2022-02-22
Supplement: supp [file elife-70555-supp-v1.zip › elife_poa_e70555_Figure_3_source_data_1.xlsx]

## Sheet: Fig.3
a
	Treg WT (Foxp3+YFP-)									Treg PHD2KO (Foxp3+YFP+)
Spleen		76.1347	81.2935	78.9855	72.4194	76.087	72.0659	67.5	81.5519	86.7971		23.8653	18.7065	21.0145	27.5806	23.913	27.9341	32.5	18.4481	13.2029
mLN		68.9168	83.496	70.1724	55.7423	69.2577	62.2985	52.6555	77.845	82.2079		31.0832	16.504	29.8276	44.2577	30.7423	37.7015	47.3445	22.155	17.7921
pLN		75.6329	83.8437	75.9184	68.4564	75.0552	67.1799	70.223	82.76	81.43		24.3671	16.1563	24.0816	31.5436	24.9448	32.8201	20.87	28.43	21.8872
Thymus		73.0114	82.8729	67.8715	65.6613	75.4011	62.5767	77.4947	82.6498	85.443		26.9886	17.1271	32.1285	34.3387	24.5989	37.4233	22.5053	17.3502	14.557
c
	Treg WT (Foxp3+YFP-)									Treg PHD2KO (Foxp3+YFP+)
Spleen		27758	26661	25695	21452	25695	20340	23089	21062	19861		14115	9208	14347	13312	13842	13098	12644	10375	9349
mLN		26751	31128	30299	23552	30607	28134	25880	26354	28525		17295	19098	18173	13098	18415	18233	14631	15388	17738
pLN		31551	32525	29994	29994	31339	28805	30230	29876	30087		17295	14726	17758	18233	18722	17641	15064	16075	14030
Thymus		37754	38271	39999	40547	36003	40685	20036	32064	31670		24030	24517	23949	25099	23008	25437	19574	18847	19803
d
	Treg WT (Foxp3+YFP-)									Treg PHD2KO (Foxp3+YFP+)
Spleen		8534	15916	14520	10837	12622	12088	21323	22585	21384		6456	1952	10631	10234	7423	11729	14464	16074	15986
mLN		14393	12486	20833	11141	16746	20642	21080	22455	24643		10837	6873	13213	7319	9874	14845	12670	14425	19305
pLN		18205	9853	16448	19492	18412	20312	19876	18500	19654		10768	4446	11117	13126	11023	13416
Thymus		17165	8569	14977	18922	16301	14714	8004	24715	19746		11165	5577	7764	9528	10042	9390	13933	15265	16566
e
	Treg WT (Foxp3+YFP-)									Treg PHD2KO (Foxp3+YFP+)
Spleen		59375	37890	52135	54232	49427	58872	49094	52180	61457		35394	27656	34075	29712	32811	33618	30419	37951	49898
mLN		46481	34822	43845	39917	38307	41486	30779	35612	41943		32988	28025	31429	27438	32198	30516	21035	25941	30419
pLN		56581	29554	36669	43242	38623	44954	45678	42678	39076		26513	21536	23207	22557	25356	23328	22654	24310	21578
Thymus		65044	45331	55003	64305	53624	55315	59961	68972	64567		50976	34075	42412	43242	42412	38729	42623	45461	38562
f
	Treg WT (Foxp3+YFP-)									Treg PHD2KO (Foxp3+YFP+)
Spleen		6995	7724	6170	6439	7060	6700	6500	7000	7200		6380	8019	5842	5842	6598	5719	5500	5780	7632
mLN		6478	6341	5895	11811	6283	5702	6754	8976	7652		6151	6207	5369	11473	6188	5305	8890	5670	7680
pLN		6341	6639	5931	6400	6380	5617	5789	6342	6100		5754	6478	5500	5754	6021	4954	5462	5943	6231
Thymus		6742	7192	6419	6659	6762	5789	7087	6790	5980		6361	6721	5719	6132	6322	5274	6593	6700	6100
