# Supplementary material for: The oxygen sensor prolyl hydroxylase domain 2 regulates the in vivo suppressive capacity of regulatory T cells
Source: eLife journal article supplement (doi:10.7554/elife.70555), 2022-02-22
Supplement: supp [file elife-70555-supp-v1.zip › elife_poa_e70555_Figure_4_source_data_1.xlsx]

## Sheet: Fig.4
c
No Treg																WT Treg																PHD2-deficient Treg
6.4	19.3	3.36	8	20.4	5.5	6.2	3.7	16.5	14.9	11.4	16.8	17.4	13.5	15.4		59.2	48.6	46.4	71	69	43	56	70.5	57.6	45.8	65.4	66.8	69.2	63.7	48.9		17.6	4.37	6.09	6.84	16	6.9	18.1	9.8	12.4	16.4	19.1	12.7	17.9	8.3	9.7
7.1	10.5	12	8	9	10.2	9.8	11.3	13.5	19.8	11.5	8.2	9.7	11.6	16.3		82.7	75.3	77	84.3	76.4	78.2	81.2	80.3	74	75.7	76.3	78.5	77	73	75.9		8.78	11.4	25.5	27.7	9.7	17.3	22.7	13.6	22.1	10	10.1	14.2	9	23.6	28.1
d
No Treg																WT Treg																PHD2-deficient Treg
59.3	75	82.2	58	76	81	84	75.4	76.9	83	85.1	59.5	63.5	66.9	73		39.7	52.5	54	30.4	49.7	51	52	39	32.6	49.5	44.5	40.1	41.9	43.7	32.8		69.6	76.9	81.9	81.6	70	74	82	76.8	74.2	65.8	66.3	73.2	62.4	71.9	80.3
32.9	85.7	40.8	76	84	48	46	76	74.5	78	83.2	87.1	45	65.8	76		17.4	25.8	24.7	18.7	18	26	22.6	17.9	22.3	29.1	39	30	22.5	21.3	12		89.1	87.7	73	71.6	86	85.6	71.2	72.3	75	72.3	71.8	73.4	71.9	88	84.5
e
No Treg																WT Treg																PHD2-deficient Treg
0	0	0	0	0	0	0	0	0	0	0	0	0	0	0		6.67	9.95	8.63	13	7.8	11.9	9.9	14.2	8.7	9.8	11.9	9.8	6.2	12.1	10.3		16.6	16.2	13.7	12.1	15.3	14.9	11.9	13.2	12.1	14.8	15.1	16.7	17.1	11.8	14.5
0	0	0	0	0	0	0	0	0	0	0	0	0	0	0		14.9	26.9	8.1	30.6	16.7	20.1	9.7	22.5	20.4	24.3	9.7	23.6	22.1	21	17		10.5	10.4	19.6	13.8	9.7	20.7	10.1	21.2	9.8	11.6	12.5	13.4	15.8	18.1	12.8
g
No Treg				Foxp3cre Treg				PHD2-deficient Treg
2	3	5	6
				56.3	60	62	59	65	60	63	56
				31.7	34	32.2	31.3	31.4	34	30	28
				16.4	17	11	10	8.1	7.7	10	11
				6.6	5.6	6	8	2.9	4	2.2	5
