# Supplementary material for: The oxygen sensor prolyl hydroxylase domain 2 regulates the in vivo suppressive capacity of regulatory T cells
Source: eLife journal article supplement (doi:10.7554/elife.70555), 2022-02-22
Supplement: supp [file elife-70555-supp-v1.zip › elife_poa_e70555_Figure_5_figure_supplement_1_source_data_1.xlsx]

## Sheet: Figure 5-figure supplement 1
a
	Foxp3cre							PHD2ΔTreg							Control
0	100	100	100	100	100	100		100	100	100	100	100	100		100	100	100	100	100	100
24	89.247	88.172	89.441	84.848	89.205	88.554		86.503	85.976	86.2395	87.234	85.752	89.569		99.441	102.809	99.474	101.9	99.75	98.547
48	89.785	85.484	84.472	82.828	85.227	84.337		83.436	85.366	84.401	86.702	85.56	83.013		100	101.685	100	101.58	101.22	100.517
68	95.699	95.161	94.41	88.889	88.636	86.145		88.957	92.073	90.515	93.085	92.7	87.45		101.676	102.809	101.053	102.207	100.58	101.851
72	92.473	91.398	91.925	86.869	87.5	84.337		88.957	90.244	89.6005	92.021	90.75	90.354		100.559	101.124	100	100.245	100.12	100.541
b
Il6				Il17a				Il12a				Ifng
Control	Foxp3cre	PHD2ΔTreg		Control	Foxp3cre	PHD2ΔTreg		Control	Foxp3cre	PHD2ΔTreg		Control	Foxp3cre	PHD2ΔTreg
0.1122	0.573985	1.36153		0.223	0.382526	0.437602		0.927593	0.554108	1.0287		0.564579	0.511227	1.29624
0.1234	0.872327	1.456		0.09	1.78773	0.8922		1.00969	0.696239	1.9		1.1202	1.11953	1.41799
0.2312	0.929633	0.98147		0.1222	0.931639	2.27759		0.5541	0.948232	2.02438		1.2125	1.20987	2.62389
0.1112	1.30395	0.916463		0.2344	1.02714	0.96		0.673932	1.19348	0.725404		0.76148	1.48135	1.78
0.3776	0.816234	0.839504		0.33142	0.966441	1.78		0.5321	1.02363	0.99		0.675836	0.920212	1.98
0.31133	1.50387	2.34136		0.33251	0.904525	1.04		1.0651	1.58432	1.76		1.66541	0.757808	2.56
