# Supplementary material for: The oxygen sensor prolyl hydroxylase domain 2 regulates the in vivo suppressive capacity of regulatory T cells
Source: eLife journal article supplement (doi:10.7554/elife.70555), 2022-02-22
Supplement: supp [file elife-70555-supp-v1.zip › elife_poa_e70555_Figure_5_figure_supplement_2_source_data_1.xlsx]

## Sheet: Figure 5-figure supplement 2
a
Foxp3cre	PHD2ΔTreg	PHD2ΔTreg IFNγKO
90	82	90
94	80	92
83	64	90
82	61	89
86	83	70
114	76	88
92	86	100
91	79	90
80	67	95
92	75	92
b
	Foxp3cre											PHD2ΔTreg											PHD2ΔTreg IFNγKO
Spleen	27.8	14.2	13.1	26.6	32.6	15.6	17.4	39.6	15.5	15.9		43.6	38.6	43.8	30.4	32.4	69.5	41	72.8	47.7	37		45.7	22.4	31.9	40	26.3	28.2	25	30.1	44.2	21
mLN	14.8	11.1	11.8	10	13.6	6.58	12	8.61	7.8	8.6		17.5	19.2	36	15.2	15.5	21.3	17.6	21.4	18.5	20		12.2	14.9	15.1	12	11.6	13.6	14.5	14.2	15.7	16
pLN	2.09	5.25	3.43	2.84	5.9	2.73	2.52	6.7	3.32	4.58		10.61	10.95	12.67	11.02	7.37	11.88	9.05	9.22	12.1	11		3.67	4.25	3.04	3.91	6.11	6.67	5.96	4.79	5.8	4.3
Lamina propria	89.2	90.3	80.1	96.6	86.5	93.9	91.3	89.7	88.1	90.8		88.3	90.2	86.3	91.9	88	87	90.5	87.4	84.9	85.8		85.6	90.4	93.4	88.4	90.4	88.7	89.6	90.4	91.2	86.4
c
	Foxp3cre											PHD2ΔTreg											PHD2ΔTreg IFNγKO
Spleen	10.6	10.3	4.7	8.74	7.29	9.07	10.6	7.63	8.18	8.61		26	21.8	20.8	15.3	16.8	19.6	22.5	14.7	30.6	35		0.1	1	1.54	0.5	1.06	0.65	1.56	1.21	1.32	0.8
mLN	0.9	2.96	1.61	1.46	1.14	2.84	2.08	1.37	0.47	0.41		2.64	3.11	3.5	3.93	10.3	9.04	6.29	5.33	4.91	8.5		1	1.43	0	0	1.09	0.9	1.3	0.97	1.44	1.1
pLN	3.31	3.32	1.5	1.26	2.76	1.09	1.45	3.08	1.54	1.84		4.57	5.84	3.97	4.68	3.56	4.72	5.16	5.15	7.81	6.9		1.09	1.45	0.3	0.2	0.69	0.92	0.92	0.83	1.09	0.5
d
	Foxp3cre											PHD2ΔTreg											PHD2ΔTreg IFNγKO
Spleen	0.79	0.52	1.42	0.41	0.87	0.64	0.54	0.59	0.84	0.3		0.57	1.04	0.81	1.07	0.4	1.62	0.7	1.74	1.21	1.8		1.5	1.42	0.92	1.31	0.77	0.59	1.48	1.12	1.16	1.8
mLN	2.51	2.72	1.9	1.13	2.51	1.64	1.76	1.7	0.92	1.26		2.47	2.26	2.3	1.64	0.78	1.09	0.68	1.14	1.46	1.3		1.89	1.11	1.97	1.16	1.03	0.95	1.13	1.01	1.36	2.3
pLN	0.81	0.66	0.97	0.46	1.34	0.79	0.56	1.96	0.67	1.6		0.81	0.72	0.33	0.91	1.24	1.58	1.72	0.98	2.44	1.5		0.49	0.74	0.54	1.01	0.65	0.91	0.92	0.96	1.1	1.8
e
	Foxp3cre											PHD2ΔTreg											PHD2ΔTreg IFNγKO
Spleen	17.6	18.4	6.8	18.1	16.9	16.2	7.82	8.3	9.37	8.14		24.1	21.4	21.1	16.7	15.6	14.9	19.8	22	23.7	19.2		20.3	14.4	17.5	25.5	17.1	17	23.9	17.8	23.1	22.3
mLN	17.1	10	6.67	8.7	9.2	17.1	9.15	10.1	9.24	8.08		17.7	16.6	18.2	20.6	17.2	17	16.9	21.8	18.8	19.6		14.2	17	16.2	15.4	14.5	15.3	15.6	15.1	15.3	16
pLN	14.9	13.6	15.1	7.48	7.94	16.9	9.53	5.46	5.46	5.27		12.5	19.5	18.6	21	21.4	17.6	17.1	16.7	15	17.9		14	14.1	13.6	13	15.5	14.5	15.2	14.5	15.6	14
Lamina propria	15.7	20.6	14.6	14.6	20.1	21.8	5.77	7.88	8.99	13.2		20.7	35.1	32.4	24.9	25.2	30.5	23.1	28.3	29.4	26.3		24.1	17.9	15.9	15.6	16	22.3	23.1	13.2	24.8	22.6
