# Supplementary material for: The oxygen sensor prolyl hydroxylase domain 2 regulates the in vivo suppressive capacity of regulatory T cells
Source: eLife journal article supplement (doi:10.7554/elife.70555), 2022-02-22
Supplement: supp [file elife-70555-supp-v1.zip › elife_poa_e70555_Figure_5_source_data_1.xlsx]

## Sheet: Fig.5
c
Foxp3cre															PHD2ΔTreg
0	0	0	0	0	0	0	0	0	0	0	0	0	0		0	0	0	0	0	0	0	0	0	4	0	2	2	4
1	1	4	5	4	4	2	1	1	2	2	2	1	1		1	3	5	2	2	2	1	1	1	7	1	1	1	7
2	5	3	2	5	5	4	4	5		1	0	1	2		6	7	6	7	6	8	9	9	9	10	9	9	9	10
2		2	4	3	6	6	5	3	4	2	4	2	0		9
d
Foxp3cre day 0	PHD2ΔTreg day 0	Foxp3cre day 6 DSS	PHD2ΔTreg day 6 DSS
90	82	60	50
94	80	75	45
83	64	68	47
82	61	65	46
86	83	61	51
114	75	76	44
92	77	65	46
91	74	64	47
80	75	66	45
89	85	62	46
91	79
94	91
98	86
101	87
h
Control	Foxp3cre	PHD2ΔTreg
95	73	71
94	75	72
100	90	71
101	82	68
98	83	83
94	78	70
101	80	67
98	89	80
97	90	75
93	95	82
i
Control											Foxp3cre											PHD2ΔTreg
30.7	11.5	23.2	20	17	15.6	14.3	27.8	27.1	10.8		9.38	10.1	29.7	45	46.7	46.3	30	14.2	24.6	11.2		73	79.6	77	66.7	68	71.4	76.8	72.9	62.1	65.1
17.5	9.49	13.9	21.1	10.9	18	17	14.5	20	12		13.6	18.6	23.5	47.2	49.3	61.6	60	15.2	24.7	21.9		64.7	37.8	38.2	42.1	60	41.9	64.7	45.4	36.2	51.2
91.5	90.2	69.7	88.4	83.4	76	78	68	85	82		86.2	97.1	97.6	98.5	95.5	93.6	97	82.4	86.1	90.4		96.3	95.4	97.8	99.2	95.2	97.2	96.1	97.4	92.8	96.1
j
Control											Foxp3cre											PHD2ΔTreg
14.9	7.01	11.6	4.75	1.65	8	5.7	11.4	4.1	2		5.1	5.55	12.4	27.6	32.5	12.5	39.7	1.25	3.76	2.07		48.2	34.1	32.9	29.3	49.3	16	17.7	21.5	20.1	28.8
7.14	6.41	6.9	1.94	0.92	5	4.8	6.3	1.7	0.6		7.2	7.74	11.8	26.4	25.6	22.5	26.5	1.54	2.53	3.96		38.1	23.2	21	25.5	41.8	17.7	39.4	17.8	10.3	24.9
9	11	9.5	10	8.77	14	12	11.6	16	12.3		22.3	18.7	14	25	35	13	19.7	13	26.8	37.8		67.9	59	45	60	67	71.2	65.1	43.4	39.6	68.1
k
Control											Foxp3cre											PHD2ΔTreg
6.45	7.57	6.5	2.5	2.47	6.2	3.4	5.6	2.3	4.3		29.2	42.9	46	41.5	50.8	29	52.1	36	37.9	40		40.2	14.9	15.5	17.8	36.8	15.8	15.3	19.5	17.2	20.8
1.73	3.45	10.2	4.15	6	2.5	4.7	9.7	3	5.3		18.8	18.3	13.6	12.7	12.3	27.2	16.8	25	22.4	19.7		12.1	15.5	8.51	10.4	13.7	7.2	6.9	7.89	9.45	3.7
20	23	40	14.6	16	22	15.7	34.5	12.7	11.4		38	32.2	24.4	31.9	40.9	8.21	27.2	25	15	30.8		24.7	24.3	36.7	27.6	39.9	9.47	13.9	12.5	8.49	8.17
