# Supplementary material for: The oxygen sensor prolyl hydroxylase domain 2 regulates the in vivo suppressive capacity of regulatory T cells
Source: eLife journal article supplement (doi:10.7554/elife.70555), 2022-02-22
Supplement: supp [file elife-70555-supp-v1.zip › elife_poa_e70555_Figure_6_figure_supplement_1_source_data_1.xlsx]

## Sheet: Figure 6-figure supplement 1
a
PHD2
Foxp3cre			PHD2ΔTreg		PHD2-HIF1αΔTreg		PHD2-HIF2αΔTreg			TKO			HIF1αΔTreg			HIF2αΔTreg
1.39963	1.22037	1.25206	0	0.00191548	0	0.00642207	0.0186131	0.0249689	0.0286748	0.0109154	0.0244742	0.0171868	1.44069	1.29822	1.37836	2.03256	1.80527	2.16216
HIF1α
Foxp3cre			PHD2ΔTreg		PHD2-HIF1αΔTreg		PHD2-HIF2αΔTreg			TKO			HIF1αΔTreg			HIF2αΔTreg
0.301728	0.262988	0.215383	0.162228	0.2157	0.00116278	0.0011476	0.309977	0.207287	0.3674	0.00305736	0.00152718	0.00829593	0.00448359	0.00292279	0	0.362604	0.329133	0.292531
HIF2α
Foxp3cre			PHD2ΔTreg		PHD2-HIF1αΔTreg		PHD2-HIF2αΔTreg			TKO			HIF1αΔTreg			HIF2αΔTreg
0.298736	0.165609	0.232173	0.363398	0.410302	0.72	0.56	0	0	0	0	0	0	0.546023	0.89	0.793142	0	0	0
c
Foxp3cre	HIF1αΔTreg	HIF2αΔTreg
90	99	96
94	89	92
83	105	96
82	97	82
86	101	91
114	102	94
92	102	98
91	95	96
80	98	97
89	100	101
d
	Foxp3cre											HIF1αΔTreg											HIF2αΔTreg
Spleen	11.9	15.5	11.8	26	15.1	29.3	31.6	15.5	11.4	30.3		31.1	12.1	31.1	22.9	13.3	17.2	14.7	22.4	16.9	17.2		22.2	22.1	25.6	21.2	13.3	15.7	17.8	23.7	22.1	17.3
mLN	12.1	12.5	11	16.7	11.2	20.3	15.8	12.6	9.35	17		13	9.04	14.5	15.1	10.5	11.9	11.5	11.5	12.7	12.2		13.1	14.7	18.4	14.2	16.3	15.4	16.1	15.3	16.2	9.5
pLN	3.09	3.91	2.6	5.01	4.35	7.69	10.6	6.54	3.41	6.78		8.06	4.85	4.03	3.41	3.5	3.36	3.44	4.89	2.7	5.1		5.04	4.15	4.75	5.81	4.5	5.7	4.3	5.09	3.9	4.3
e
	Foxp3cre											HIF1αΔTreg											HIF2αΔTreg
Spleen	10.6	10.3	4.7	8.74	7.29	9.07	10.6	7.63	8.18	8.61		11	5.86	14.2	11.4	7.07	4.61	3.87	7	8.53	9		8.01	9.04	8.13	7.36	8	5.43	7.41	6.9	7.32	9.12
mLN	0.9	2.96	1.61	1.46	1.14	2.84	2.08	1.37	0.47	0.41		2.9	1.82	2.7	1.86	1.9	0.07	5	1	1.2	1.4		2.75	1.9	2.33	1.87	0.67	0.59	0	0.8	1.3	2.6
pLN	3.31	3.32	1.5	1.26	2.76	1.09	1.45	3.08	1.54	1.84		3.7	1.96	1.55	2.16	1.46	3.82	1.89	1.2	1.3	3.5		2.41	2.16	2.27	2.29	1.12	1.46	1.12	2.4	2.54	1.36
f
	Foxp3cre											HIF1αΔTreg											HIF2αΔTreg
Spleen	17.6	18.4	6.8	18.1	16.9	16.2	7.82	8.3	9.37	8.14		19.2	7.31	19.3	17.8	7.03	10.9	11.8	6.63	16.1	16.4		19.2	7.31	19.3	17.8	7.03	10.9	11.8	6.63	16.2	8.84
mLN	17.1	19	6.67	17.9	19.4	17.1	9.15	10.1	9.24	8.08		19.6	6.21	20.9	19.1	6.57	9.71	8.45	6.9	18.2	18.5		19.6	6.21	20.9	19.1	6.57	9.71	8.45	6.9	18.6	6.78
pLN	14.9	13.6	15.1	7.48	7.94	6.17	5.71	4.47	4.99	17		7.2	9.6	8.15	9.24	9.85	7.67	9.26	6.86	5.38	9.62		7.2	9.6	8.15	9.24	9.85	7.67	9.23	7.68	9.26	6.86
g
Foxp3cre	HIF1αΔTreg	HIF2αΔTreg
0.910266	0.860117	1.15345
0.890396	0.900804	1.1033
0.898912	0.946903	1.04368
1.15345	0.830249	1.02356
1.1033	0.855189	0.98492
1.04368	0.98363	1.04147
1.02356	0.9983	0.950047
0.98492	1.01822	0.949718
1.04147	1.04	1.01822
0.950047	1.01822	1.03207
