# Supplementary material for: The oxygen sensor prolyl hydroxylase domain 2 regulates the in vivo suppressive capacity of regulatory T cells
Source: eLife journal article supplement (doi:10.7554/elife.70555), 2022-02-22
Supplement: supp [file elife-70555-supp-v1.zip › elife_poa_e70555_Figure_6_source_data_1.xlsx]

## Sheet: Fig.6
b
Foxp3cre	PHD2ΔTreg	PHD2-HIF1αΔTreg	PHD2-HIF2αΔTreg	TKO
90	82	79	99	101
94	80	85	89	102
83	64	88	105	102
82	61	82	97	100
86	83	72	97	96
114	75	88	99	100
92	77	80	106	99
91	74	77	102	102
98	75	85	96	98
97	85	79	103	94
100	79	75	95	97
105	91	80	96	101
98	86	83	108	105
101	87	85	97	99
100	77	87	94	95
d
Foxp3cre																				PHD2ΔTreg																				PHD2-HIF1αΔTreg
11.9	15.5	11.8	26	15.1	29.3	31.6	15.5	11.4	30.3	17.2	14.7	22.4	16.9	17.2						34.5	26.2	39.1	26.7	23.5	48.8	24.9	32.7	50.8	57.3	53.5	37.7	45.6	61.7	57.4						28.5	41.3	82.3	36.6	32.2	39	32.4	32.4	32.5	47
12.1	12.5	11	16.7	11.2	20.3	15.8	12.6	9.35	17	11.9	11.5	11.5	12.7	12.2						15	15	18.7	16	14.3	14.8	17.1	18.2	15.6	30.6	20	19.8	23.1	20.7	18.1						28.7	14.9	18.7	18.2	17.7	15.3	19.2	18.1	18.2	17.5
3.09	3.91	2.6	5.01	4.35	7.69	10.6	6.54	3.41	6.78	3.36	3.44	4.89	3.56	3.05						5.71	4.58	9.48	4.17	6.05	7.06	9.75	9.92	7.73	6.43	7.54	6.3	7.71	7.69	10.2						7.58	6.44	7.83	8.44	8.26	8.03	6.62	6.52	7.77	7.87
e
Foxp3cre																				PHD2ΔTreg																				PHD2-HIF1αΔTreg
10.6	10.3	4.7	8.74	7.29	9.07	10.6	7.63	8.18	8.61	7	8.53	9	7.6	9						26	21.8	20.8	15.3	16.8	19.6	22.5	14.7	30.6	16.4	18.9	20.1	25	19.5	31						63.9	18.6	14.2	17.8	34.9	23.6	35.7	29.5	34.8	22.1
0.9	2.96	1.61	1.46	1.14	2.84	2.08	1.37	0.47	0.41	2	5	1	1.2	1.4						2.64	3.11	3.5	3.93	10.3	9.04	6.29	5.33	4.91	3.93	10.3	10.1	8.4	6	5.4						1.01	2.04	2.76	1.42	8.35	10.1	20.9	12.8	9.43	10.6
3.31	3.32	1.5	1.26	2.76	1.09	1.45	3.08	1.54	1.84	3.8	1.4	1.2	1.3	3.5						5.98	4.92	5.53	6	8.8	6.5	7	6.1	8.6	7.8	6.4	7.1	5.4	9.4	8						2.62	2.44	3.81	2.99	9.46	8.37	9.09	3.1	3.34	5.2
f
Foxp3cre																PHD2ΔTreg																PHD2-HIF1αΔTreg																PHD2-HIF2αΔTreg
17.6	18.4	6.8	18.1	16.9	16.2	7.82	8.3	9.37	8.14	16.1	16.4	16.2	8.84	9.48		24.1	21.4	21.1	16.7	15.6	14.9	19.8	22	23.7	19.2	18.6	24.6	24	22.7	19.9		11.9	20.4	15.9	16.7	28.8	21.5	27.6	32.5	30.7	28.4	20.7	23.9	28.8	29	30		14.7	14.2
17.1	19	6.67	17.9	19.4	17.1	9.15	10.1	9.24	8.08	18.2	18.5	18.6	6.78	9.92		17.7	16.6	18.2	20.6	17.2	17	16.9	21.8	18.8	19.6	20.5	16.7	21	18.9	19.4		9.31	21	25.2	18.8	26.6	20.5	19.8	21.3	22.3	20.8	20.3	16.5	18.6	18.2	18.7		15.7	14.5
14.9	13.6	15.1	7.48	7.94	6.17	5.71	4.47	4.99	17	5.38	9.62	9.26	6.86	7.68		12.5	19.5	18.6	21	21.4	17.6	17.2	19.5	18.1	22	23.4	16.8	18.5	17.9	19.5		15.8	18.3	24.6	19.3	17.9	20.7	18.5	18.3	16.6	19.6	17	17.9	20.1	22	24.6		11.7	13.5
15.7	20.6	14.6	14.6	20.1	15.7	20.6	14.6	14.6	20.9	18.2	14.3	15.6	19.1	18.7		36	35.1	32.4	24.9	25.2	30.5	23.1	37	34.1	31.9	28.9	26.2	35	29.7	27.9		12.5	29.7	20	25.6	23.9	23.6	21	22	28	28.7	23	27.5	22.9	27.6	26.8		14.9	18
g
WT	PHD2 ΔTreg	PHD2- HIF1αΔTreg	PHD2- HIF2αΔTreg	PHD2- HIF1α- HIF2αΔTreg
0.910266	0.779688	1.02733	0.947026	0.94003
0.890396	0.879041	0.919887	0.981079	0.952524
0.898912	0.886611	0.566447	0.913543	0.922539
1.15345	0.884718	0.822411	0.901549	0.950525
1.1033	0.957587	0.822411	1.01822	1.15345
1.04368	0.948162	0.870213	1.03207	1.1033
1.02356	1.0921	0.81	1.05551	1.04368
0.98492	0.918933	0.79664	1.00591	1.02356
1.04147	0.917393	0.98716	0.974043	1.04368
0.950047	0.950121	0.81111	0.991005	1.02356
0.949718	0.855189	0.91122	1.02904	0.98492
1.01822	1.00483	0.92222	1.0213	1.1123
1.03207	0.89	0.766	0.98761	1.215
1.05551	0.87	0.8123	0.97651	0.93681
0.944489	0.92	0.72346	1.1321	0.98751
[truncated: 35 more columns]
