# Supplementary material for: The oxygen sensor prolyl hydroxylase domain 2 regulates the in vivo suppressive capacity of regulatory T cells
Source: eLife journal article supplement (doi:10.7554/elife.70555), 2022-02-22
Supplement: supp [file elife-70555-supp-v1.zip › elife_poa_e70555_Figure_7_figure_supplement_1_source_data_1.xlsx]

## Sheet: Figure 7-figure supplement 1
	Code
GEO Submission	GSE184581
