# Supplementary material for: The oxygen sensor prolyl hydroxylase domain 2 regulates the in vivo suppressive capacity of regulatory T cells
Source: eLife journal article supplement (doi:10.7554/elife.70555), 2022-02-22
Supplement: supp [file elife-70555-supp-v1.zip › elife_poa_e70555_Figure_8_source_data_1.xlsx]

## Sheet: Fig.8
c
Foxp3cre	PHD2ΔTreg	PHD2-HIF2αΔTreg
277	191	285
209	230	250
302	208	260
262	237	365
300	190	316
305	197	389
265	205	300
270	208	300
330	186	280
d
Foxp3cre	PHD2 ΔTreg	PHD2- HIF2αΔTreg
2826	4312	3292
4580	4523	4250
3500	5126	4098
3654	3123	3675
4238	4238	3421
4321	4180	3212
3876	5023	3987
3452	3406	4087
2987	3609	3765
e
	Foxp3cre																				PHD2ΔTreg																				PHD2-HIF2αΔTreg
Spleen	40.2	34.7	42.4	28.9	41	31.1	47.1	40.7	45.2	42	47.8	43.1									30	31.6	24.5	34.6	34.2	29	38.1	33.1	26.7	21	24	30.5									44	39	48	34	34.8	32.7	35.6	51	32.7
mLN	19.8	26.4	21.2	14.8	21.8	14.4	25.6	19.2	34.1	30	26.5	27.4									15	14.4	20	17.9	19.2	18.3	16.5	17.8	13.8	15.7	15.5	15.1									27	20	19.3	26.9	22.7	24	19.7	19.8	25
[truncated: 3 more columns]
