# Supplementary figures and images for: The oxygen sensor prolyl hydroxylase domain 2 regulates the in vivo suppressive capacity of regulatory T cells
Source: eLife journal article supplement (doi:10.7554/elife.70555), 2022-02-22

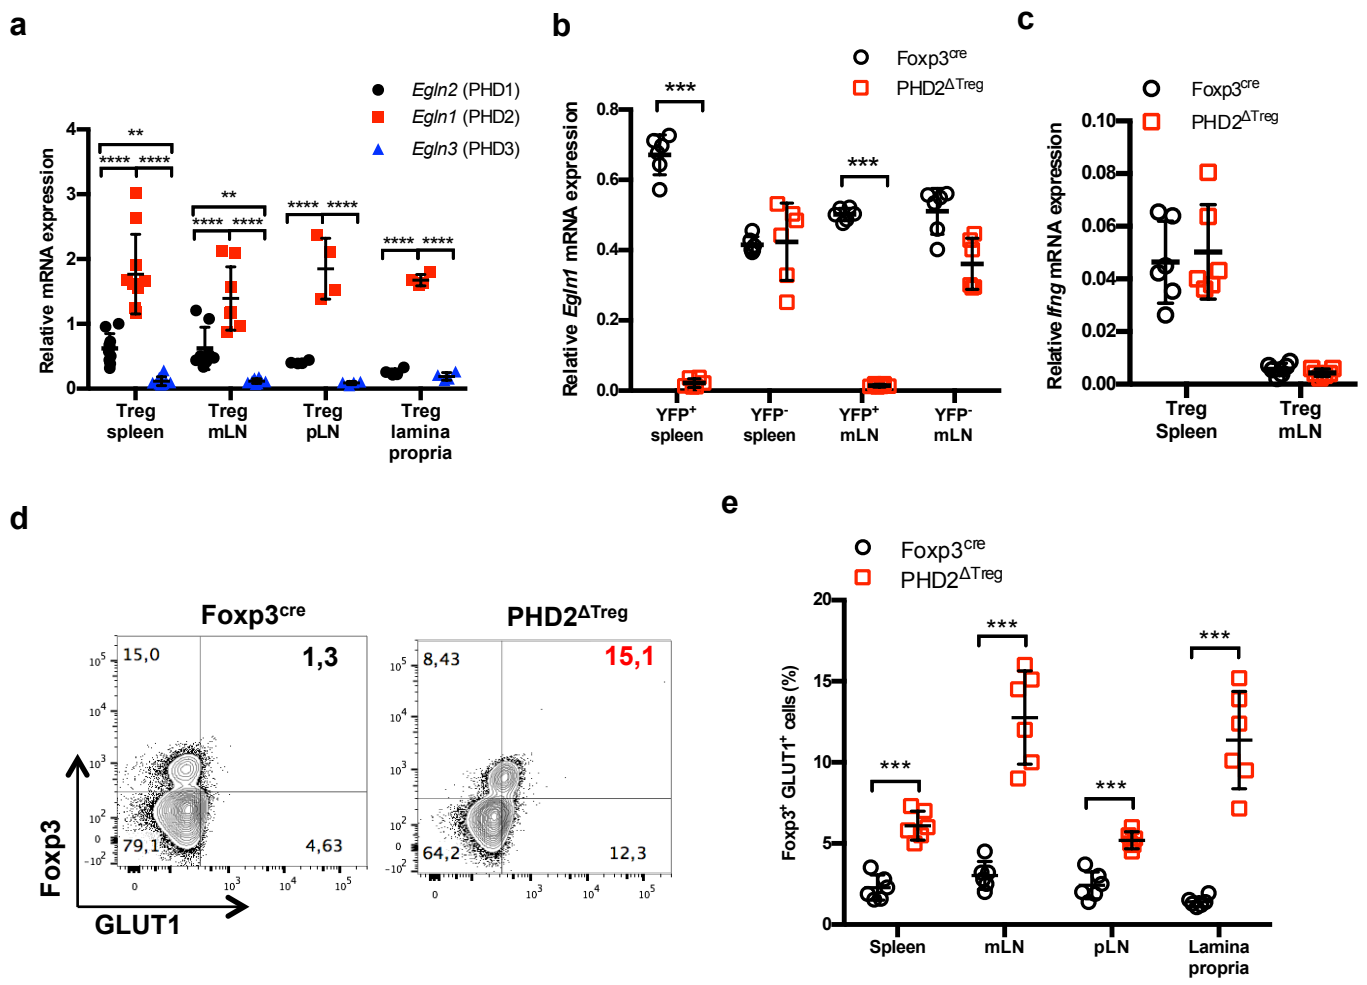

Figure 1-figure supplement 1. Treg-restricted loss of *Egl1* gene expression in *PHD2*<sup>ΔTreg</sup> mice.

Supplement: supp [file elife-70555-supp-v1.zip]

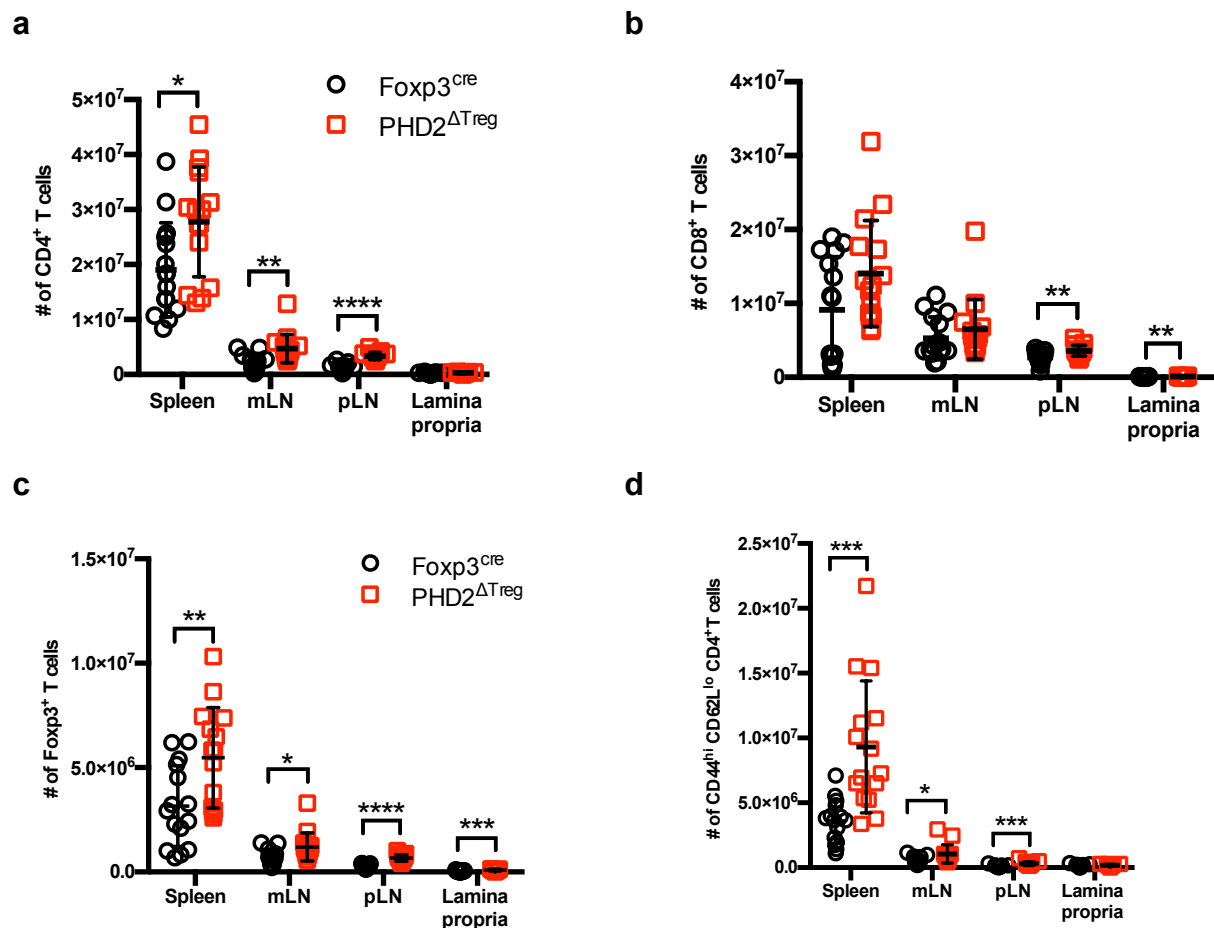

Figure 1-figure supplement 4. Absolute cell counts.

Supplement: supp [file elife-70555-supp-v1.zip]

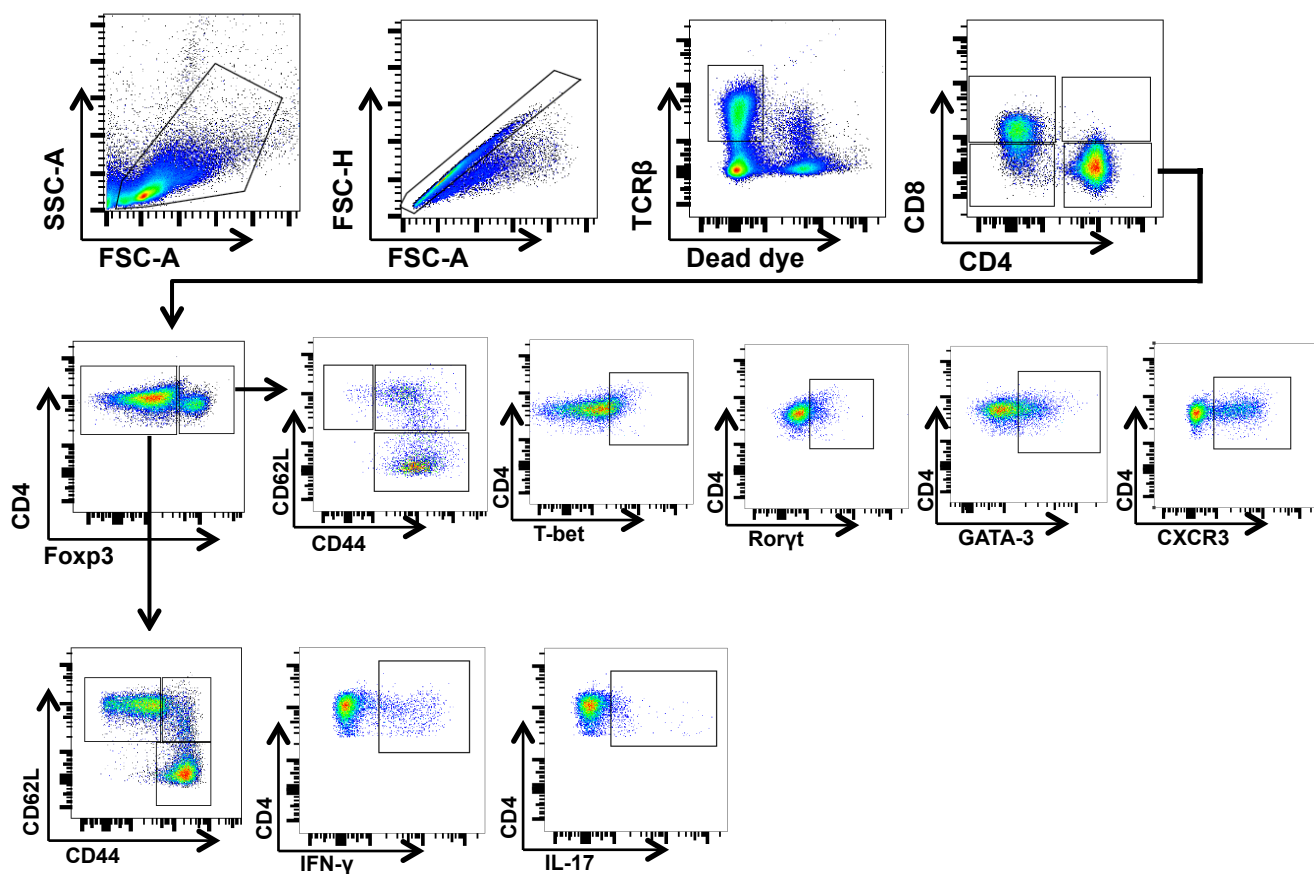

Figure 1-figure supplement 3. Gating strategy for flow cytometry data analysis.

Supplement: supp [file elife-70555-supp-v1.zip]

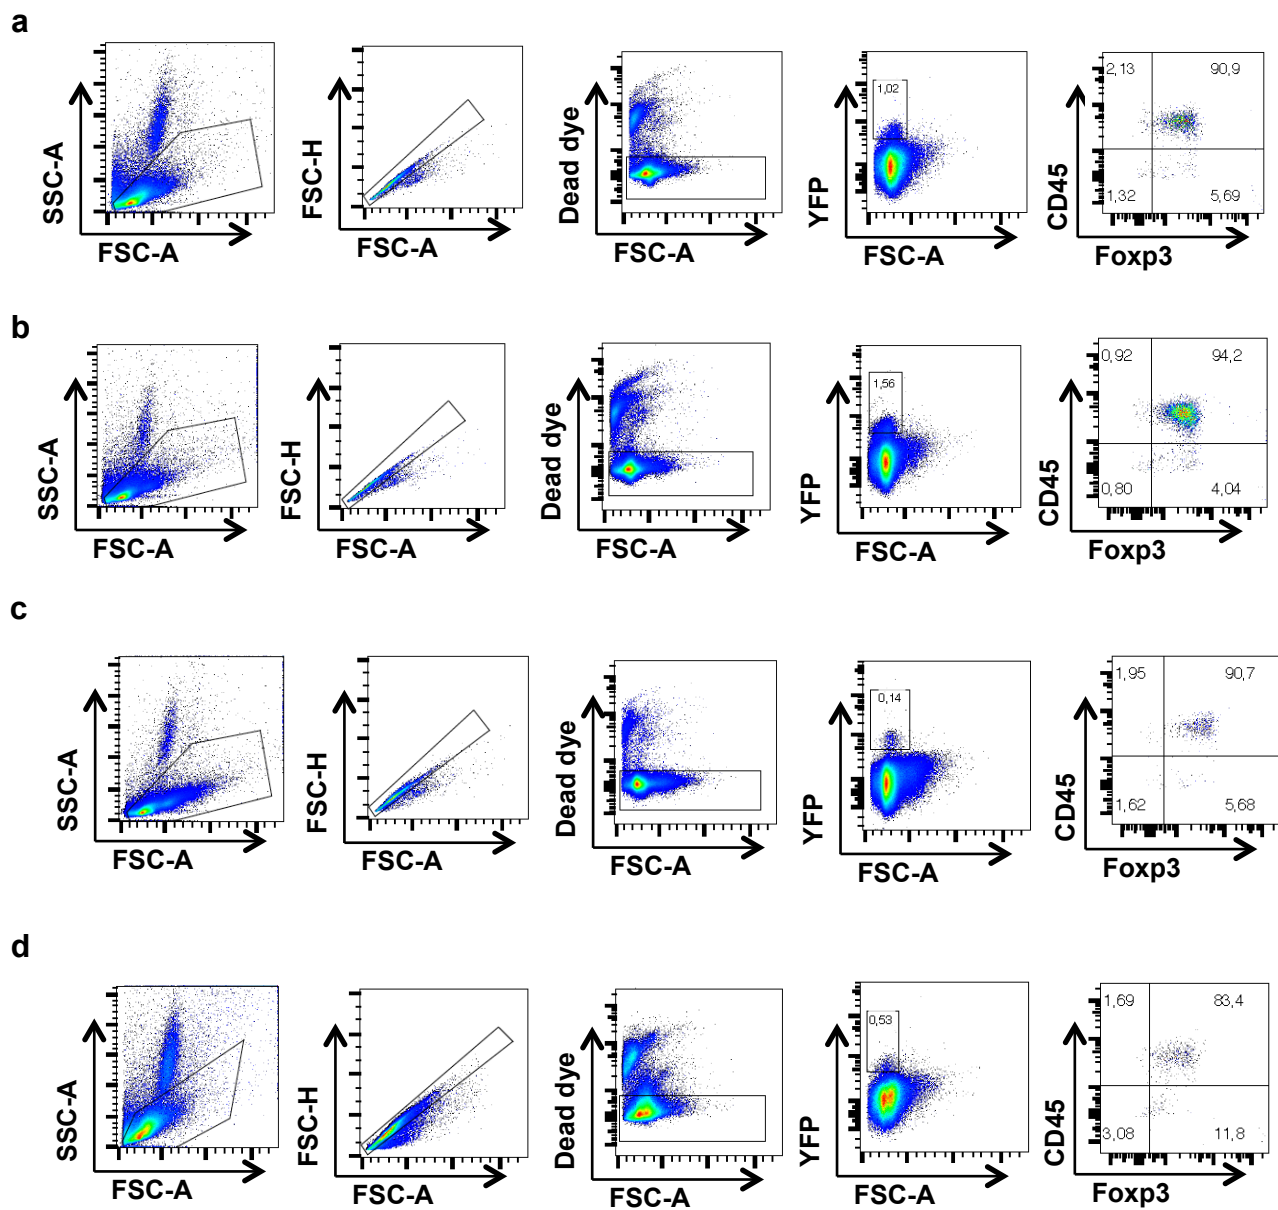

Figure 8-figure supplement 1. Gating strategy for identification of YFP<sup>+</sup> cells.

Supplement: supp [file elife-70555-supp-v1.zip › elife_poa_e70555_Figure_8_figure_supplement_1.pdf]
